# Supplementary material
Source: PubMed Central journal article supplement (PMC5793917)
Supplement: NIHMS851430-supplement-2.pdf [file NIHMS851430-supplement-2.pdf]

## Supplementary Figure 1- Uncropped scans of immunoblots with molecular weight markers indicated

(The corresponding cropped blots in main figures are shown in red box here in the full Gel)

**Fig.2 f**

Lane#:

- 1: Tma19 lysate;
- 2: Ppt1 lysate;
- 3: Tma19 no HS biotin pull down;
- 4: Tma19 HS biotin pull down;
- 5: Tma19 (unrelated experiment);
- 6: Ppt1 no HS biotin pull down;
- 7: Ppt1 HS biotin pull down;
- 8: Ppt1 (unrelated experiment);

Anti-GFP:

Lane #: 1 2 3 4 5 6 7 8

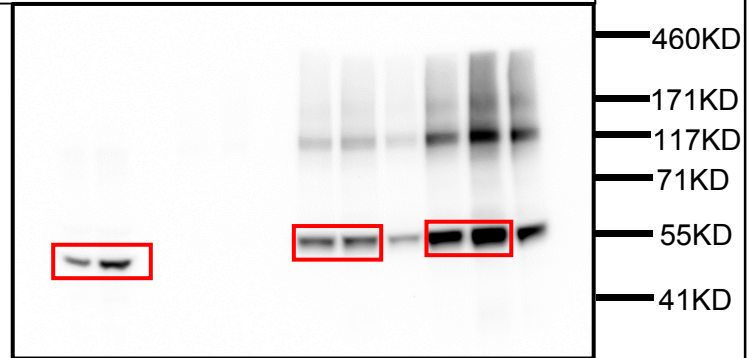

Lane#: 1 2 3 4 5 6 7 8

Anti-HA

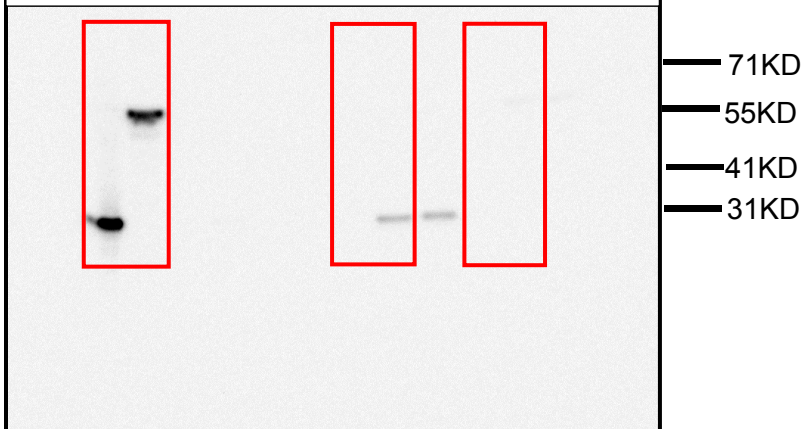

Fig. 3 c

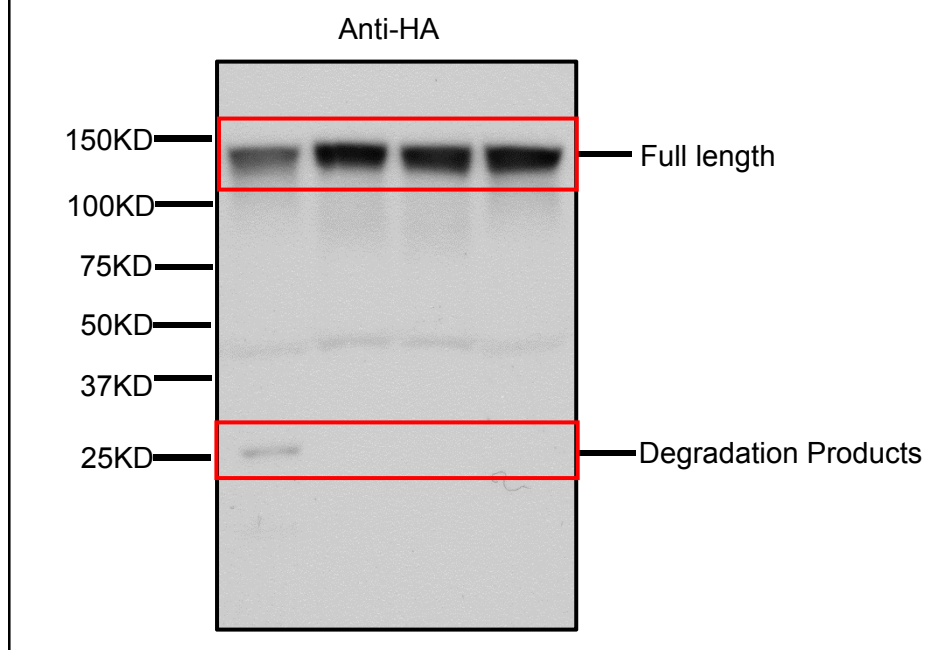

Fig. 3d

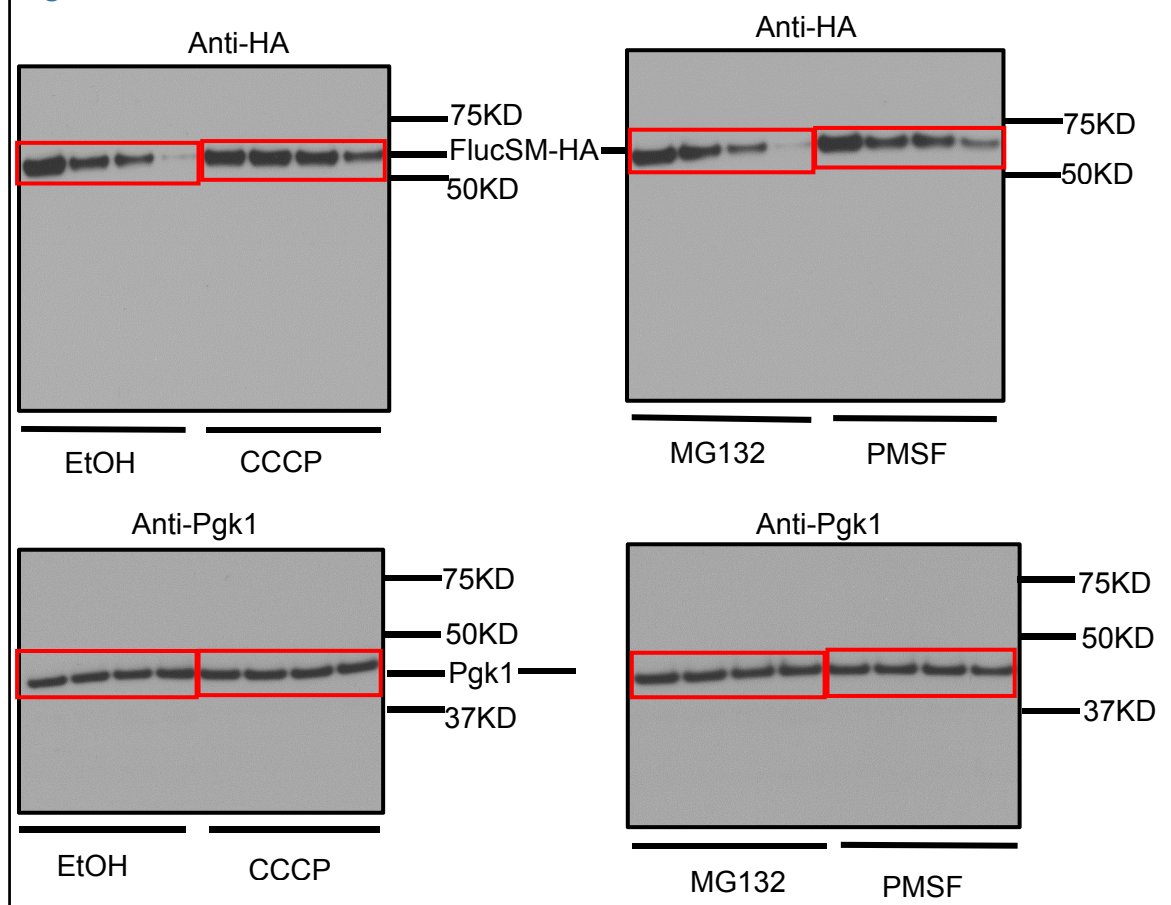

Extended Data Fig.1 f

Anti-HA

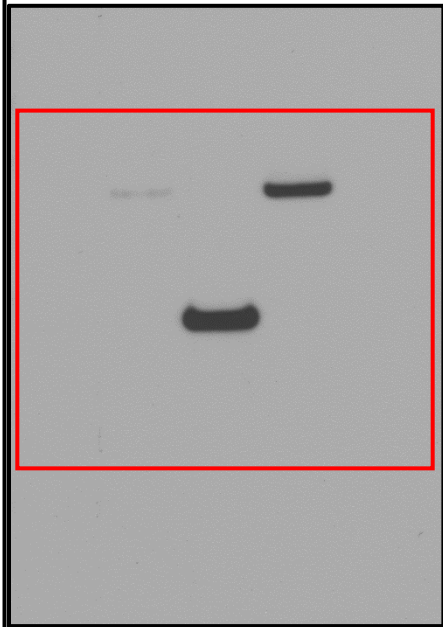

Whole cell lysates of  
3 Tom70-HA single colonies

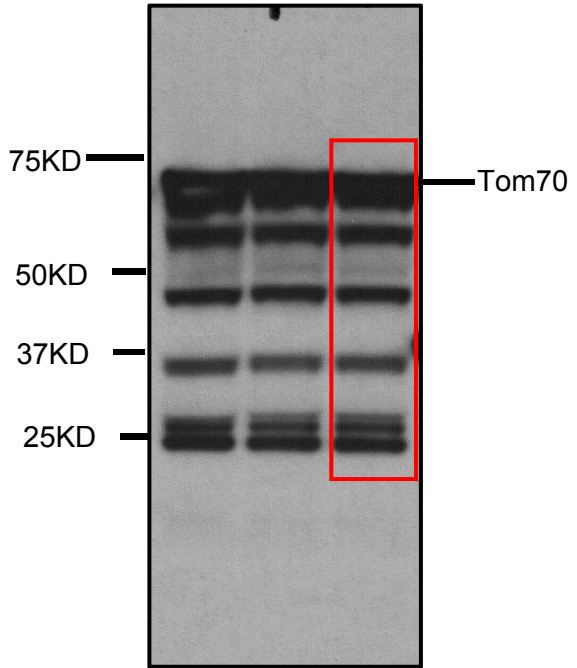

Whole cell  
lysates of 2  
Om45 single  
colonies

Whole cell  
lysates of 3  
Tom40 single  
colonies

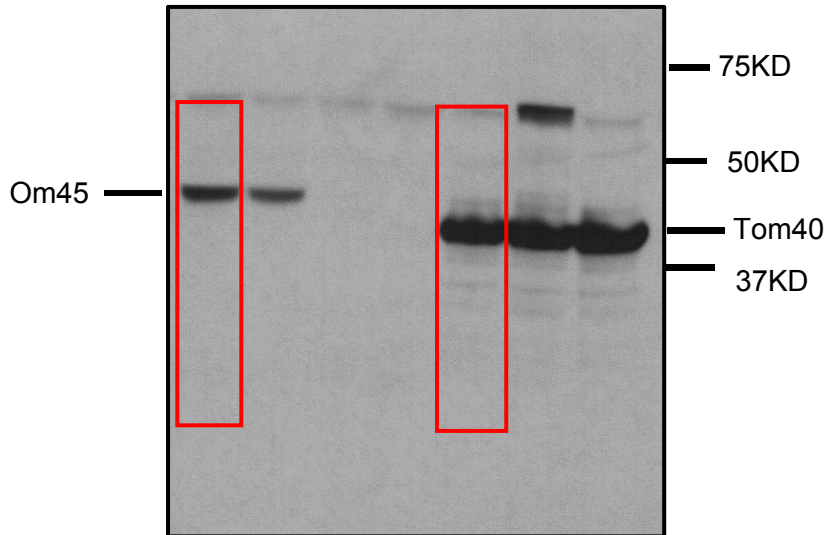

Extended Data Fig. 1g

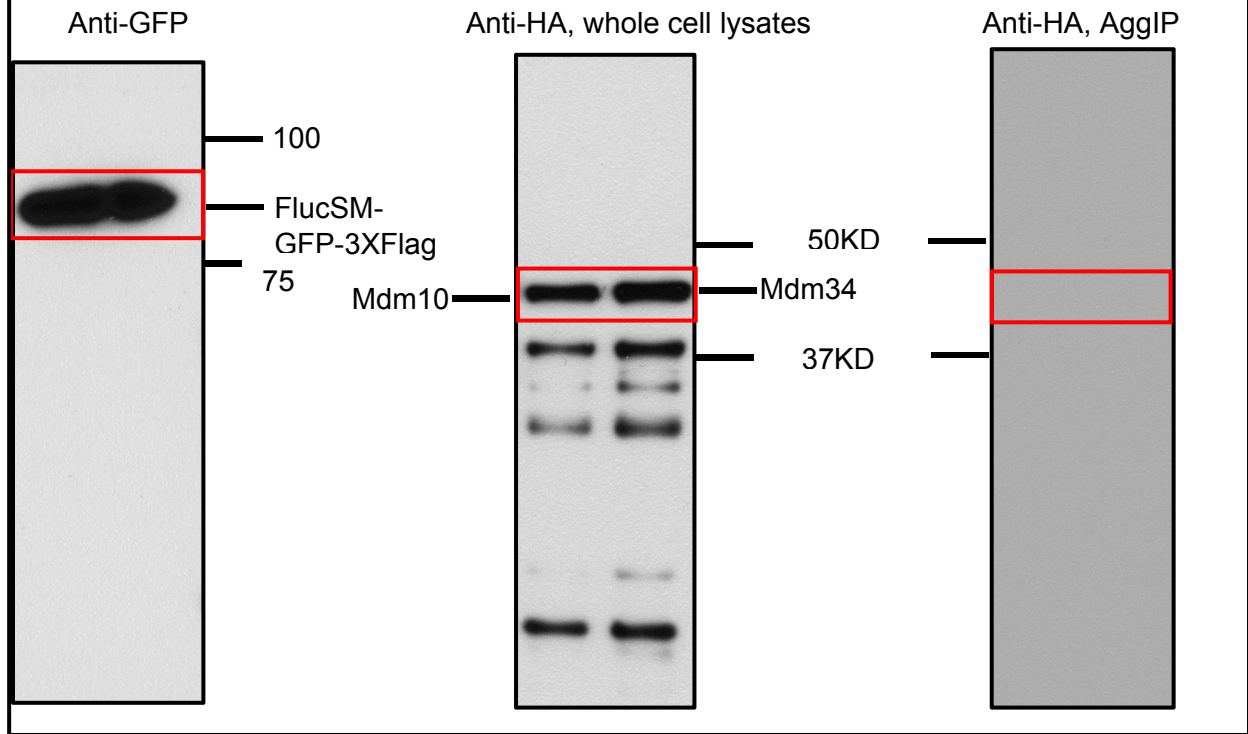

Extended Data Fig. 2l

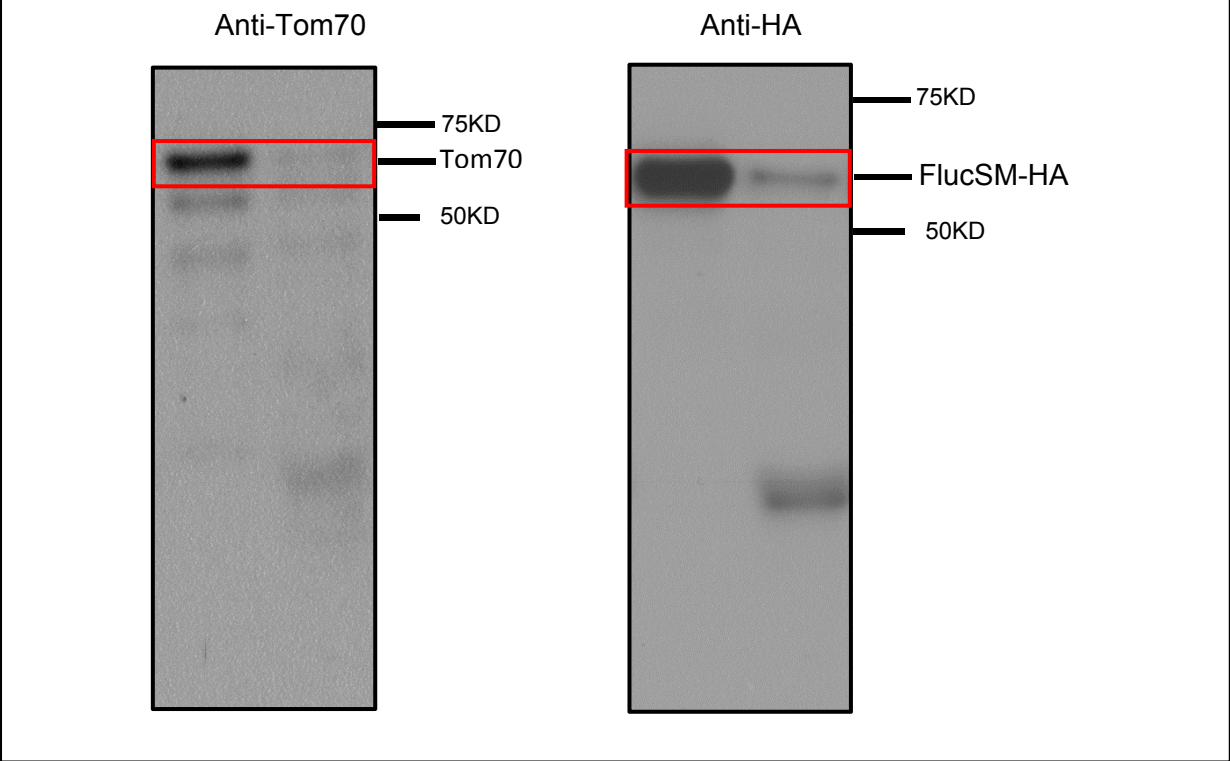

Extended Data Fig. 2m

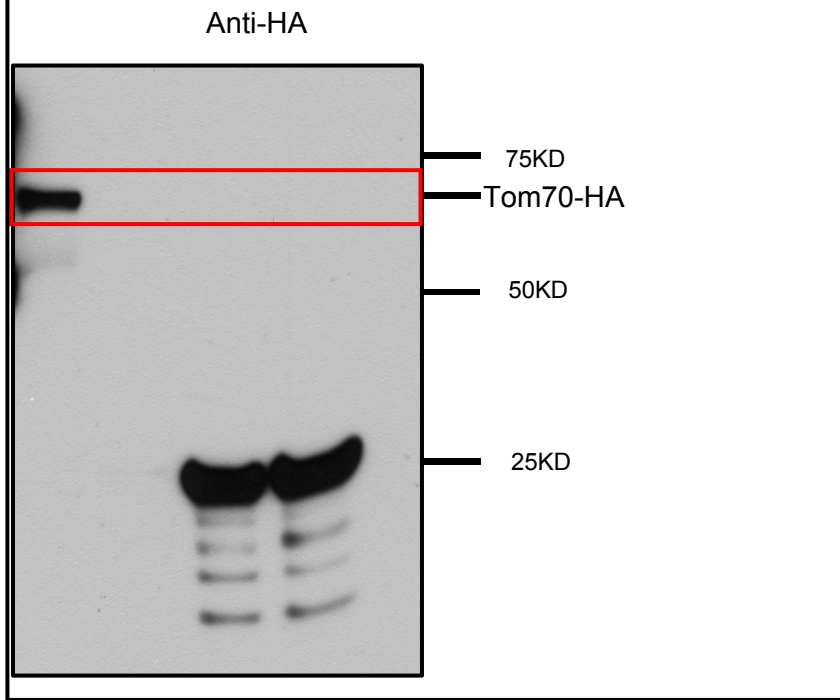

Extended Data Fig. 2n

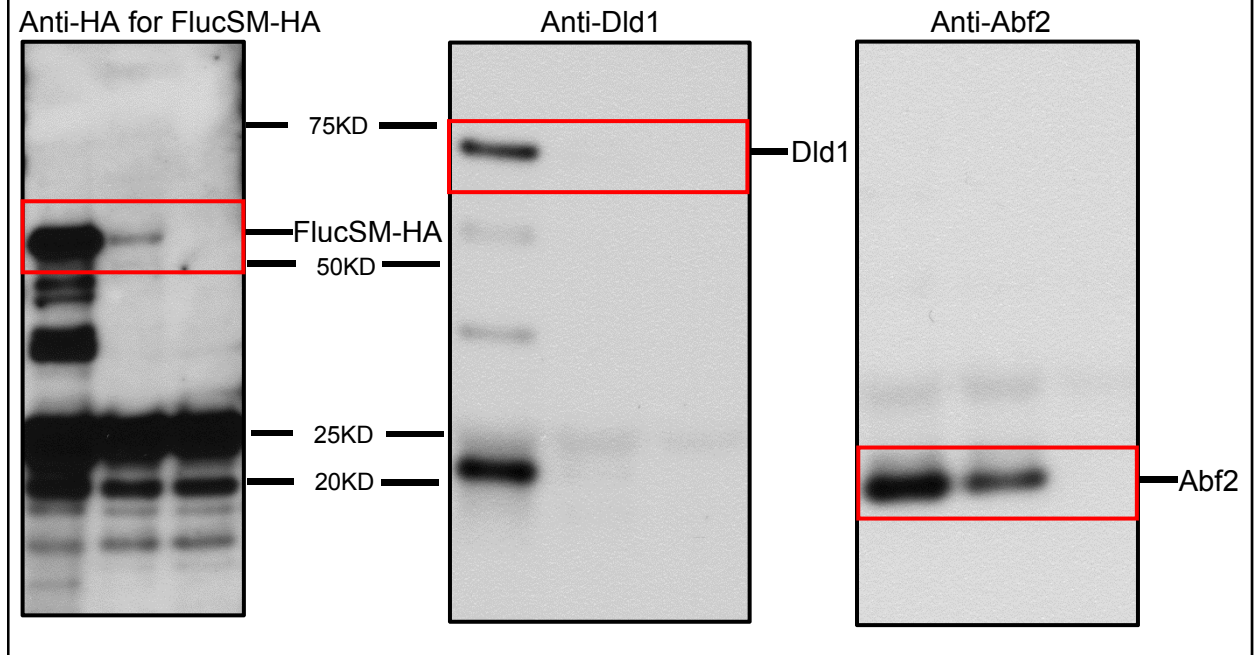

Extended Data Fig. 3e

Anti-HA *HSP104*

Light exposure

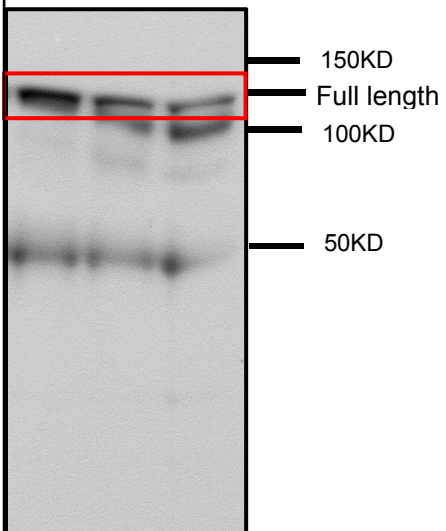

Long exposure

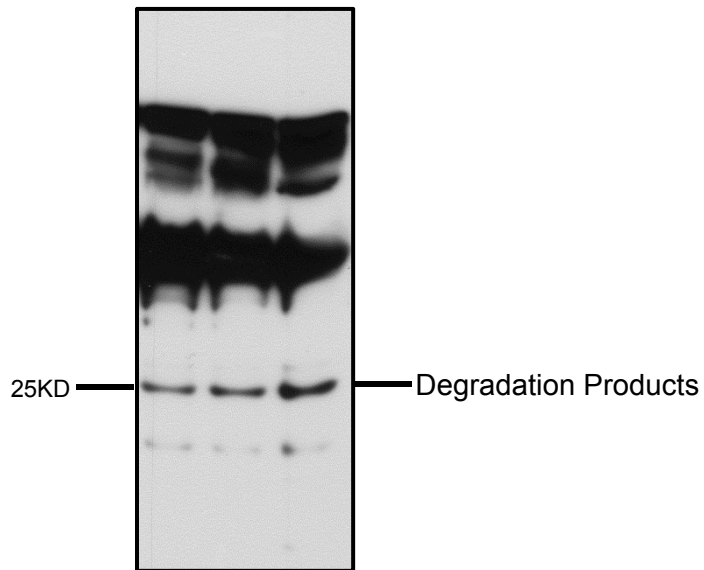

Anti-HA  $\Delta$ *hsp104*

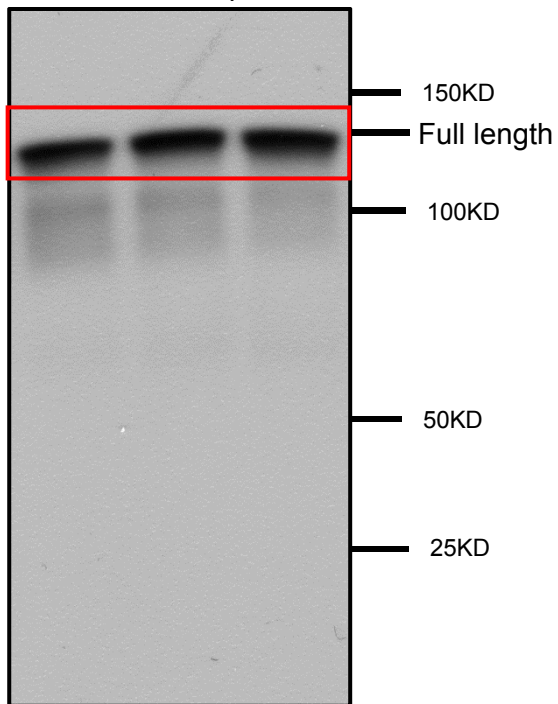

Extended Data Fig. 4e

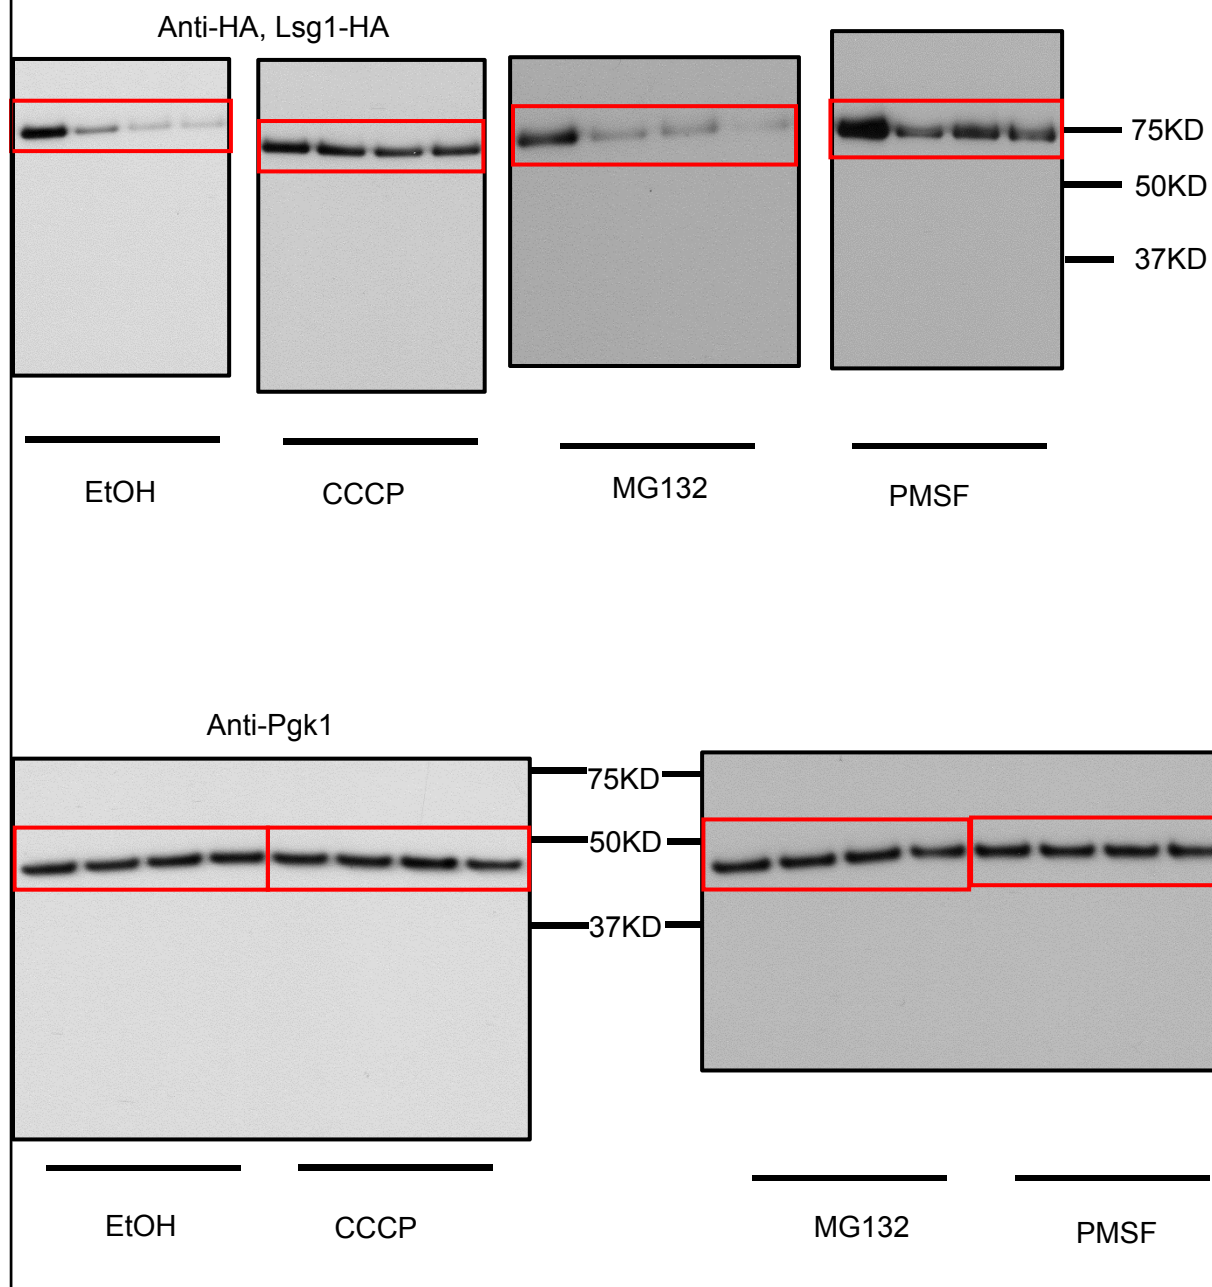

Extended Data Fig. 4g

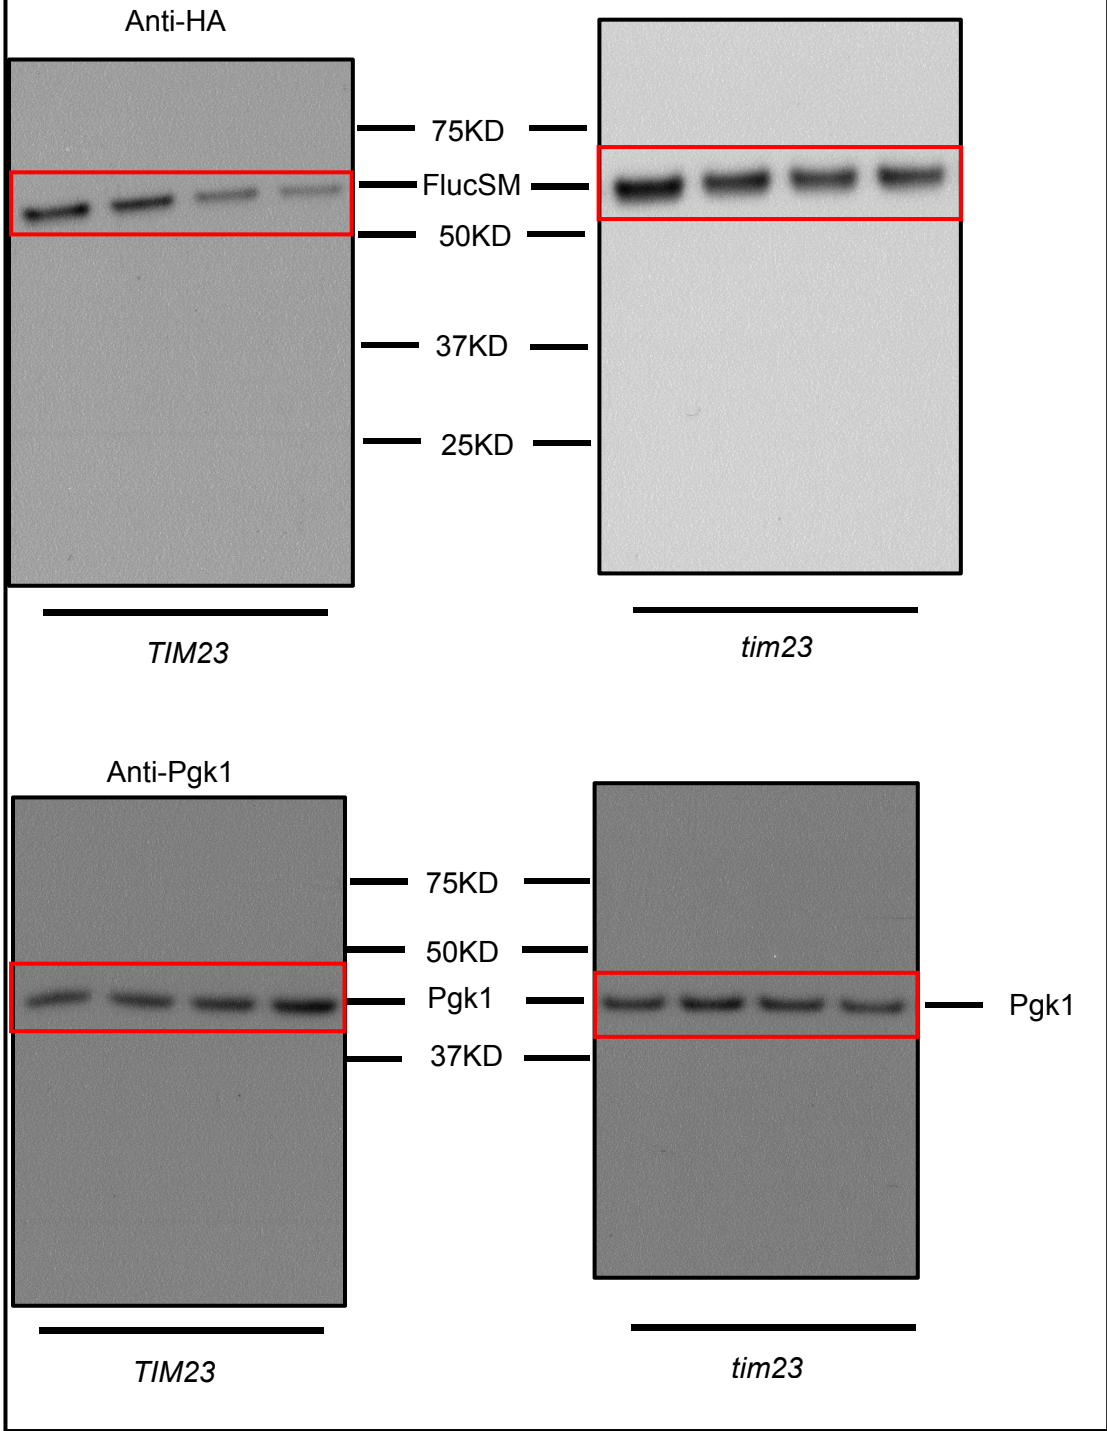



Extended Data Fig. 4i

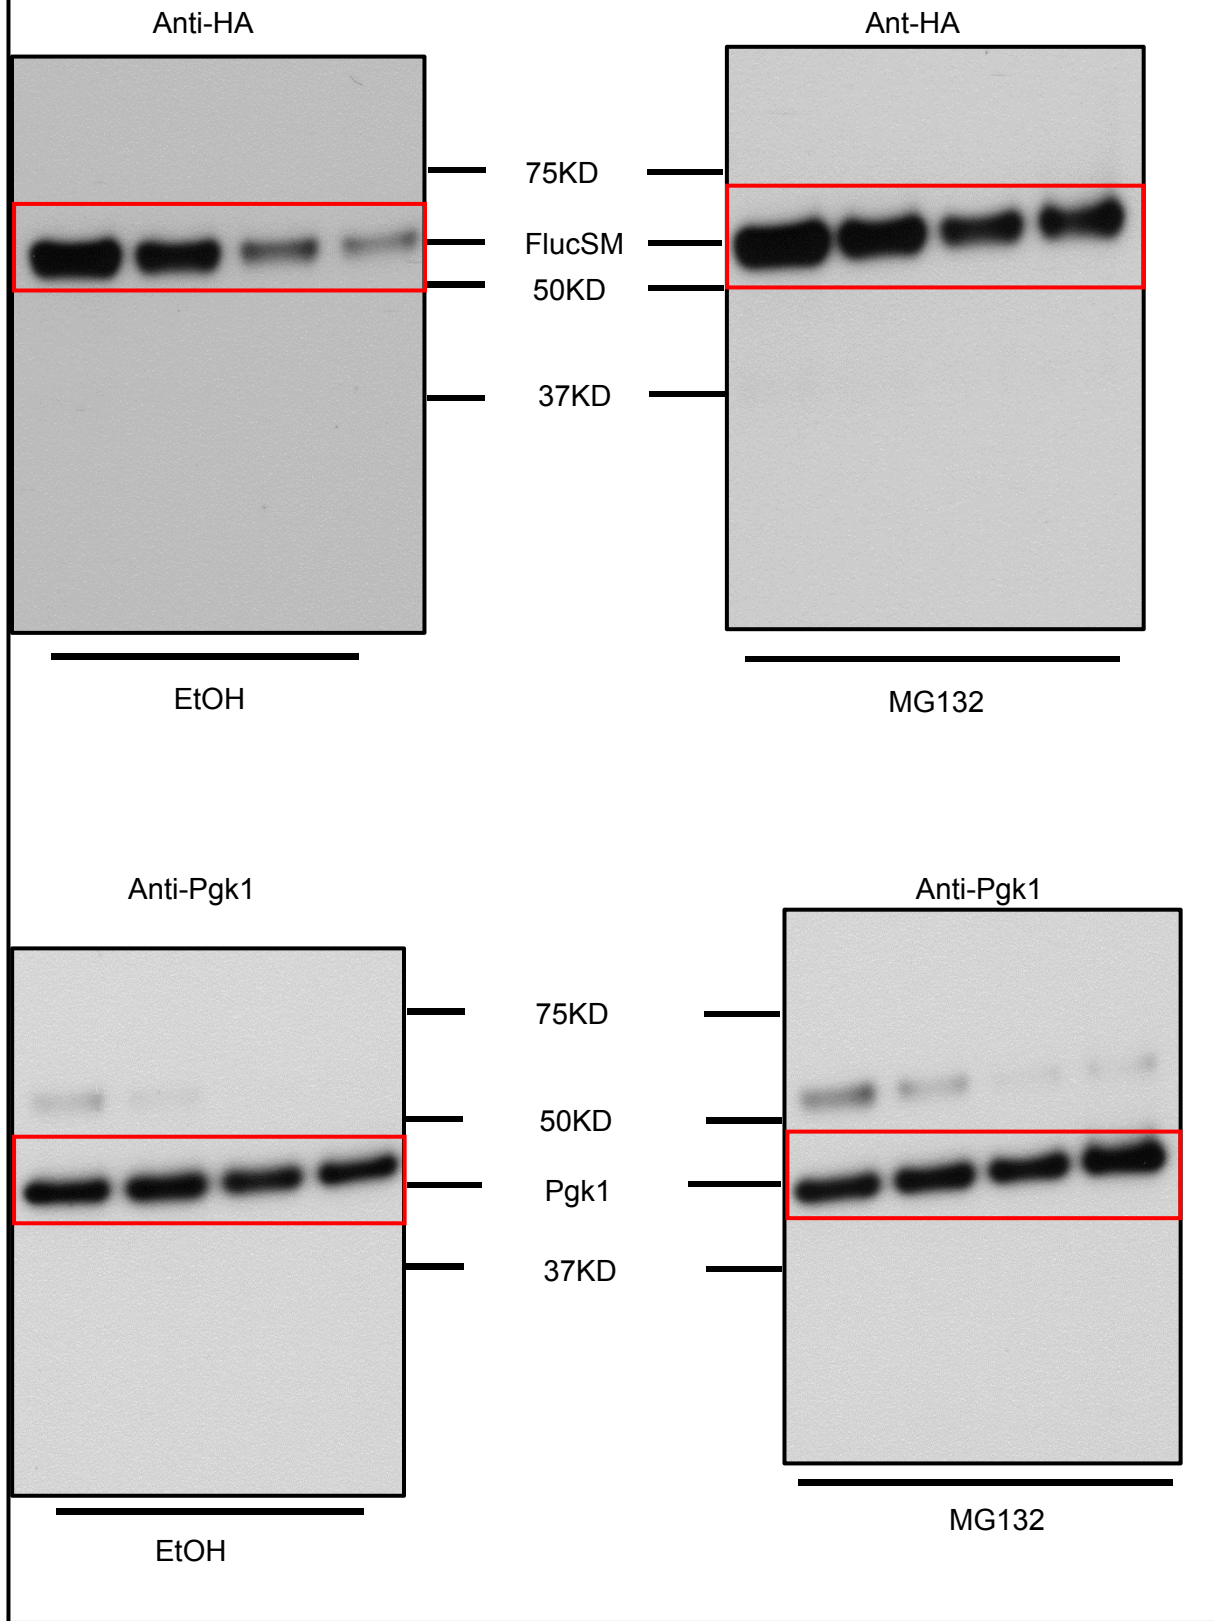

Extended Data Fig. 6g

Anti-GAPDH

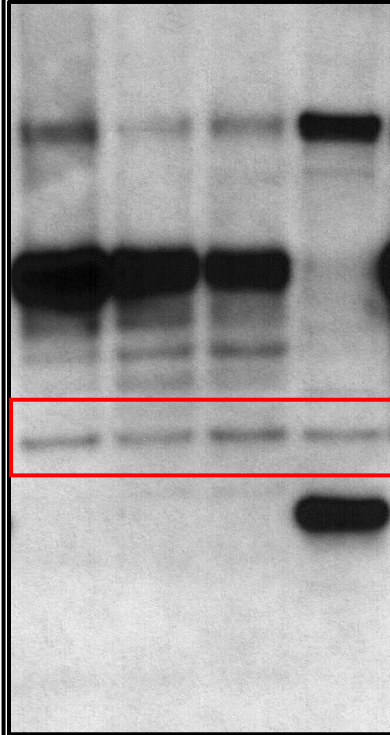

\*Note this is the scan after sequential detection using anti-HA rabbit antibody and anti-GAPDH mouse antibody. GAPDH served as loading control. When being detected by itself, GAPDH showed only a single band around 37KD.

75KD  
Fluc-HA-GFP<sub>11</sub>  
50KD  
37KD GAPDH  
25KD GST-HA-GFP<sub>11</sub>

Anti-HA

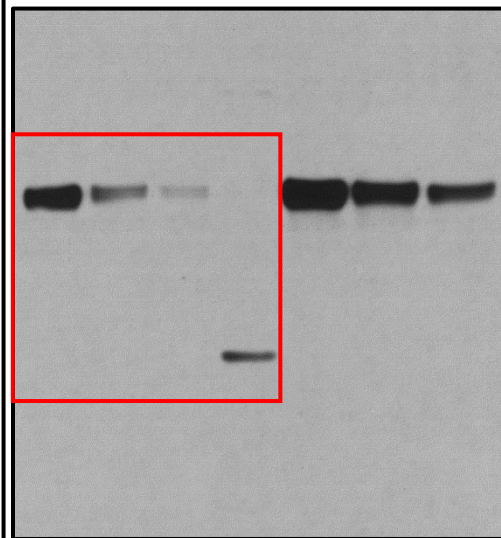

75KD  
Fluc-HA-GFP<sub>11</sub>  
50KD  
37KD  
25KD GST-HA-GFP<sub>11</sub>
